# Supplementary figures and images for: Novel eco-friendly antiscalant for major inorganic scaling control: laboratory tests and scale-up in a pilot RO unit
Source: Royal Society of Chemistry journal article supplement (doi:10.1039/d5ew00448a), 2025-01-01

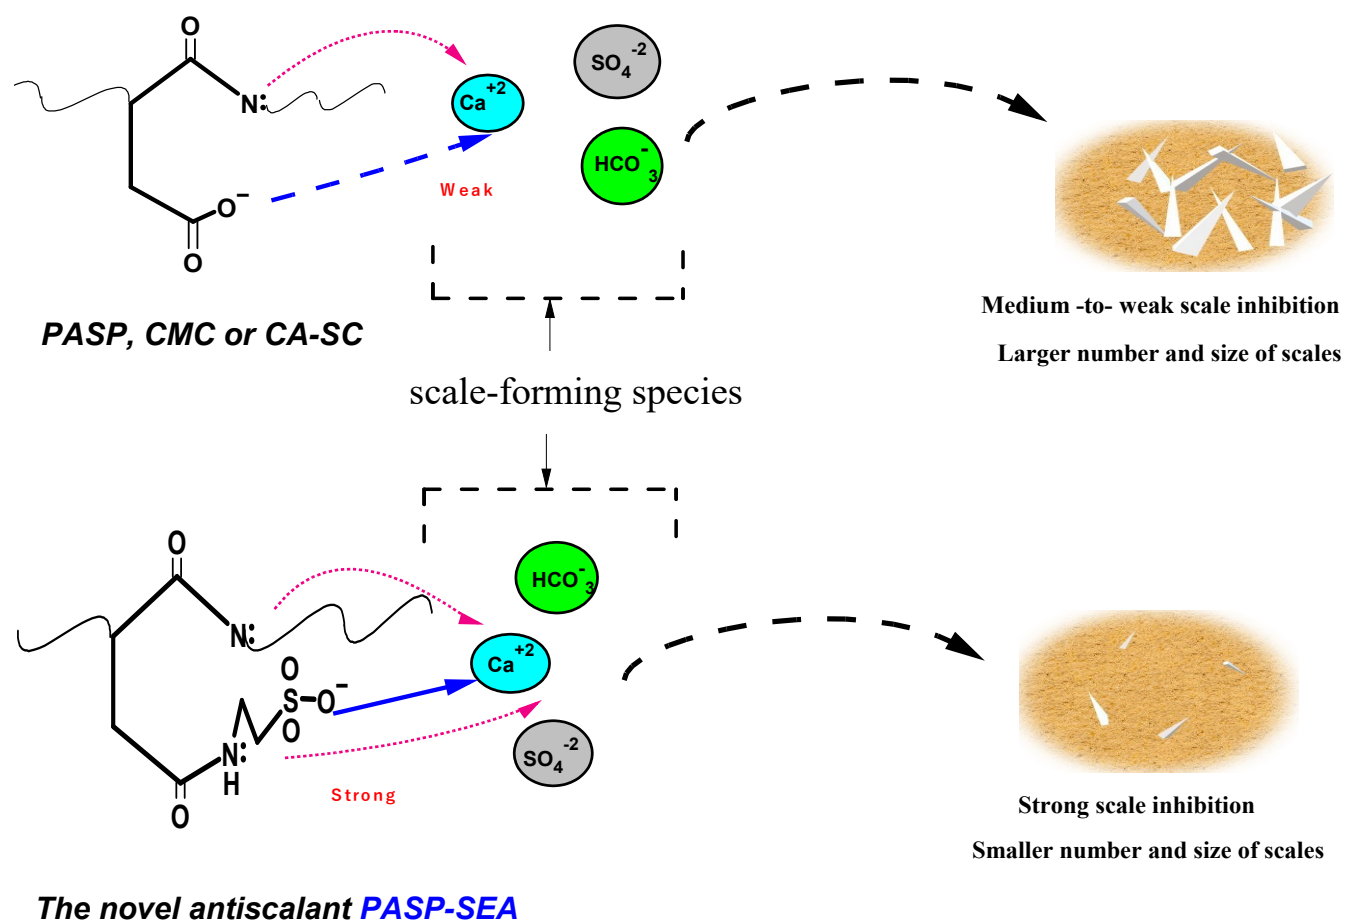

Supplement: d5ew00448a1.pdf [file d5ew00448a1.pdf]
